# Supplementary material for: HDAC inhibitors target IRS4 to enhance anti-androgen receptor (AR) therapy in AR-positive triple negative breast cancer
Source: Research Square preprint supplement (doi:10.21203/rs.3.rs-2361617/v1), 2023-01-30
Supplement: Supplementary file 1 [file ae347f91d442af0ac058a265.xlsx]

## Sheet: Sheet1
Table S2. RT-qPCR primers used in this study
Gene name	Forward sequence	Reverse sequence
IRS4	TGGCGAGCAGGAGTATCAC	AGGTCTCCATCTGACTGTCAAT
CHST2	CCTCTCGGAATGAAGGTGTTC	GTTGAGCATAGTGAGCACCAG
ADRA2C	GCCTCAACGACGAGACCTG	CCCAGCCCGTTTTCGGTAG
CAMK1D	TGAGATAGCCGTCCTGAGAAA	GCATGACCAAGTACAGGTGATT
TEX15	TATCAGACTGGTTGCCAAACG	TCCAGGTCAGCGAAGTTTTTC
KLHDC8A	TGGACTGCTTCGAGGTCTACT	CTTTGGCCGTGACAGAAATGC
RYR2	CATCGAACACTCCTCTACGGA	GGACACGCTAACTAAGATGAGGT
WNT16	AGTATGGCATGTGGTTCAGCA	GCGGCAGTCTACTGACATCAA
GDNF	GGCAGTGCTTCCTAGAAGAGA	AAGACACAACCCCGGTTTTTG
CALCB	ACCCGGCCACACTCAGTAA	GGGCACGAAGTTGCTCTTCA
BRDT	CTGTTGACGTTAATGCTTTGGG	CACAACTTCGTGATCTGGAGG
