# Supplementary material for: HDAC inhibitors target IRS4 to enhance anti-androgen receptor (AR) therapy in AR-positive triple negative breast cancer
Source: Research Square preprint supplement (doi:10.21203/rs.3.rs-2361617/v1), 2023-01-30
Supplement: Supplementary file 2 [file b22addaabf29dd5670d2dd2b.xlsx]

## Sheet: Sheet1
Table S3. Mean expression level of genes detected by RNA-Seq
gene	Con-mean	Enz-mean	Chid-mean	Comb-mean
CHST2	35.3333	43.6667	208	431.333
ADRA2C	36.3333	36	115.667	137.667
CAMK1D	13.6667	8.33333	111.667	184.333
TEX15	3.33333	1	14.3333	61.6667
KLHDC8A	2	1.66667	13.6667	33.3333
RYR2	4.33333	4.33333	16	20.3333
IRS4	2.33333	2.33333	3.66667	23
WNT16	3	2.66667	6	11
GDNF	1	0.666667	4.66667	13.3333
CALCB	0.666667	0	3.33333	12.6667
BRDT	0	0.333333	0.333333	8.66667
