# Supplementary material for: HDAC inhibitors target IRS4 to enhance anti-androgen receptor (AR) therapy in AR-positive triple negative breast cancer
Source: Research Square preprint supplement (doi:10.21203/rs.3.rs-2361617/v1), 2023-01-30
Supplement: Supplementary file 3 [file f4ed84d6f13b79b70e6582eb.xlsx]

## Sheet: Sheet1
Table S1. Antibodies used in this study
Factor or PTM	Vendor	Cat Number	Dilution For blotting	Dilution For IHC
AR	Cell Signaling Technology	5153S	1:1000	1:500
CyclinE1	Cell Signaling Technology	4129	1:1000
p16INK4	Abcam	ab189034	1:1000
CyclinD1	Santa Cruz	sc-450	1:1000
mTOR	Cell Signaling Technology	2983S	1:1000	1:500
p-mTORSer2448	Cell Signaling Technology	5536S	1:1000
p70S6K	Cell Signaling Technology	34475S	1:1000
p-p70S6KThr421/Ser424	Cell Signaling Technology	9204S	1:1000
IRS4	Santa Cruz	sc-373778	1:500	1:50
Ki-67	ZSGB-BIO	ZM-0166
GAPDH	ProteinTech	60004-1-Ig	1:5000
β-actin	ProteinTech	CL594-66009	1:5000
